# Supplementary material for: Identification of new leads against ubiquitin specific protease-7 (USP7): a step towards the potential treatment of cancers
Source: Royal Society of Chemistry journal article supplement (doi:10.1039/d4ra06813k), 2024-01-01
Supplement: d4ra06813k1.pdf [file d4ra06813k1.pdf]

Figures S31 and S35 have been replaced due to errors in the original.

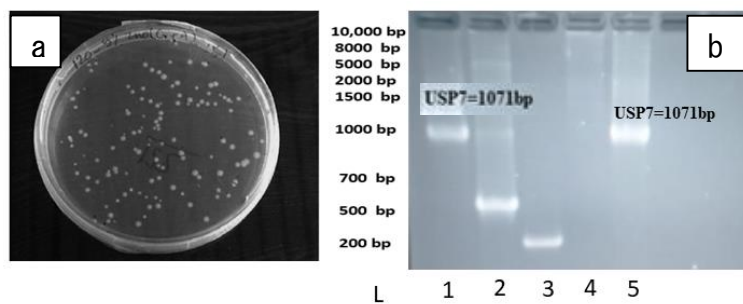

**S1 Fig. Agar Plates showing the successful transformation and Colony PCR Gel (a).** Colonies for USP7-CD plasmid (b) The 1% agarose gel analysis for USP7-CD, L indicates the ladder, lane 1 and 5 are for gene of USP7-CD.

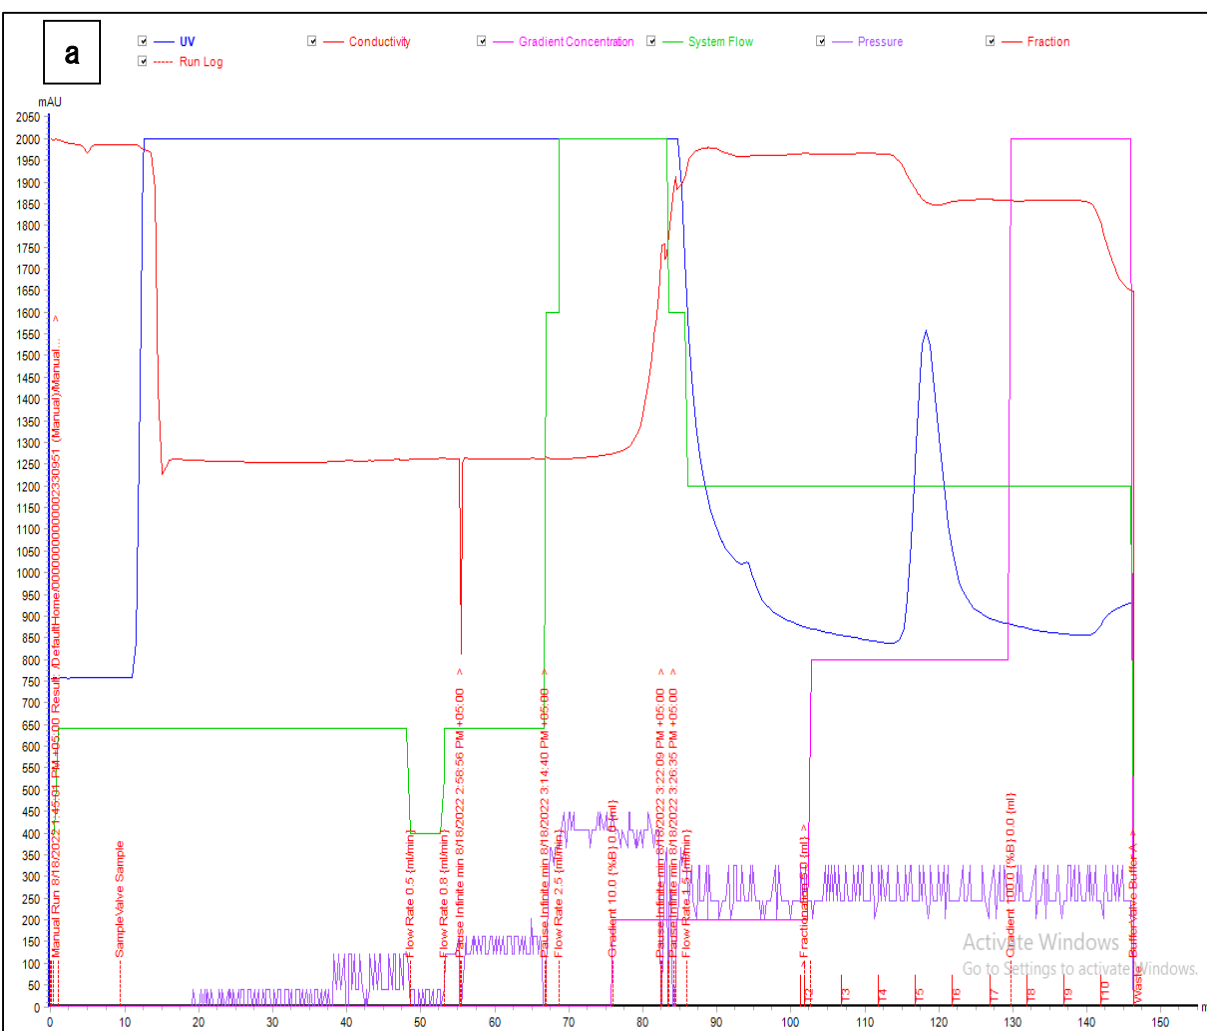

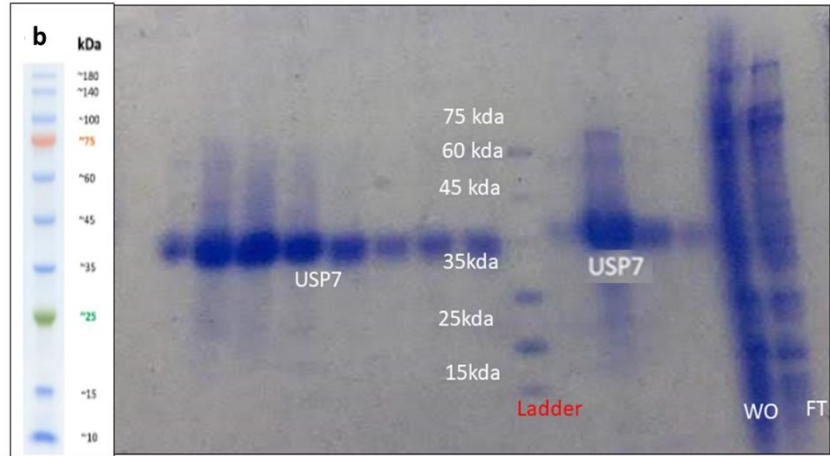

**S2 Fig. The FPLC-and SDS-PAGE profile for USP proteins** (a) Chromatogram represents the peak from the 0-90ml for an unbound protein. The protein eluted at 140ml represents the target protein (USP7-CD) highlighted by circle (b) The SDS-PAGE analysis of purified protein fractions of the USP7-CD. The fractions before the ladder represents the USP7 protein and fractions after the ladder represents the WO (wash out) and FT (flow-thru).

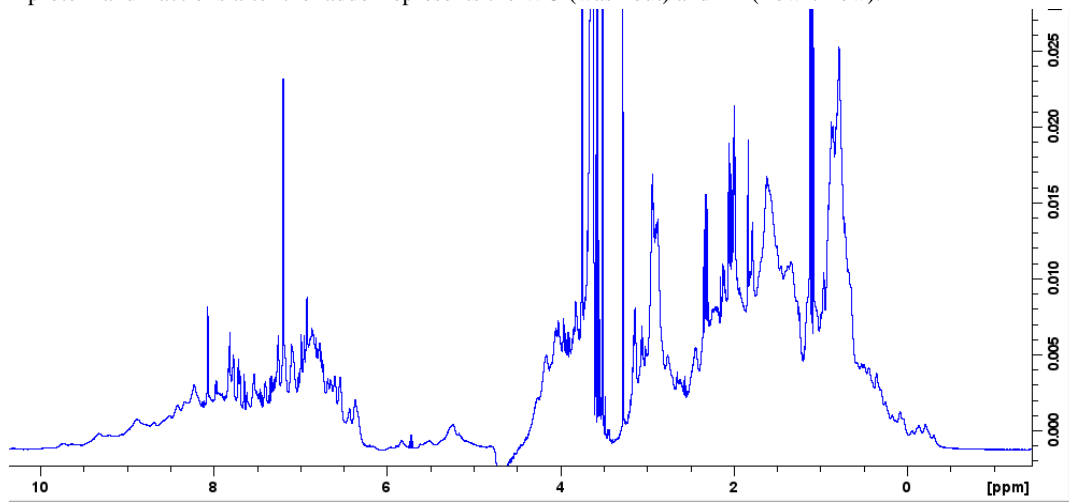

**S3 Fig. The <sup>1</sup>H-NMR Spectra for USP7-CD**

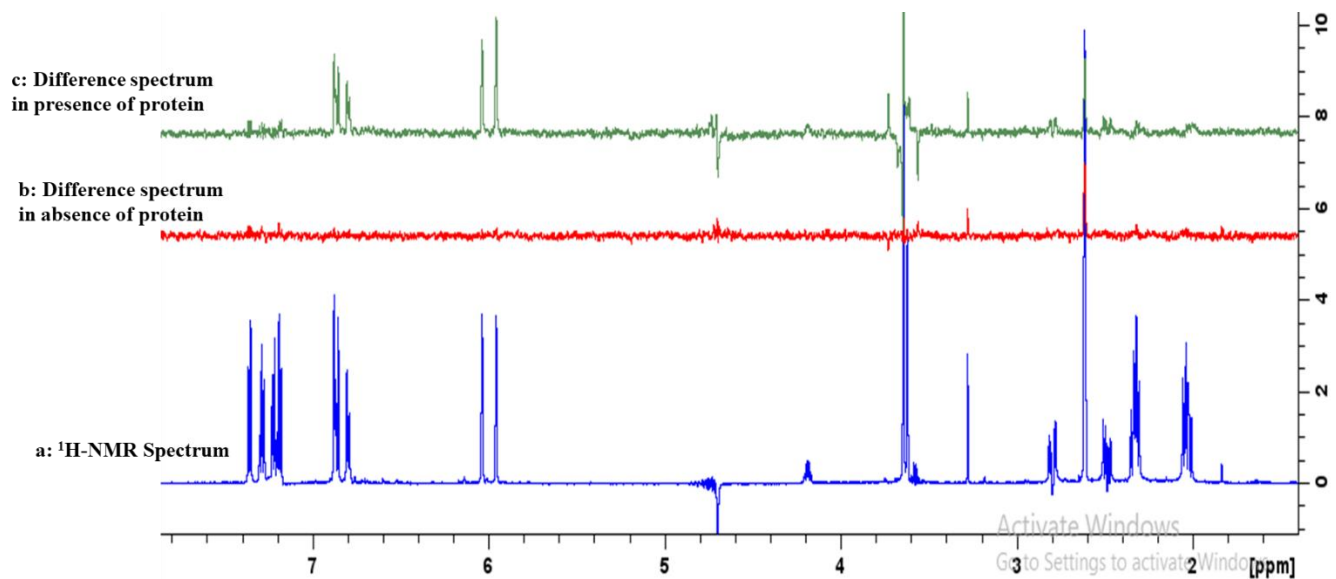

S4 Fig. NMR Analysis of Mixture 1. a)  $^1\text{H}$  spectrum (blue) of the mixture, b) STD reference spectrum recorded in the absence of protein (red), c) STD difference spectrum recorded in the presence of  $10\ \mu\text{M}$  USP7 protein (green).

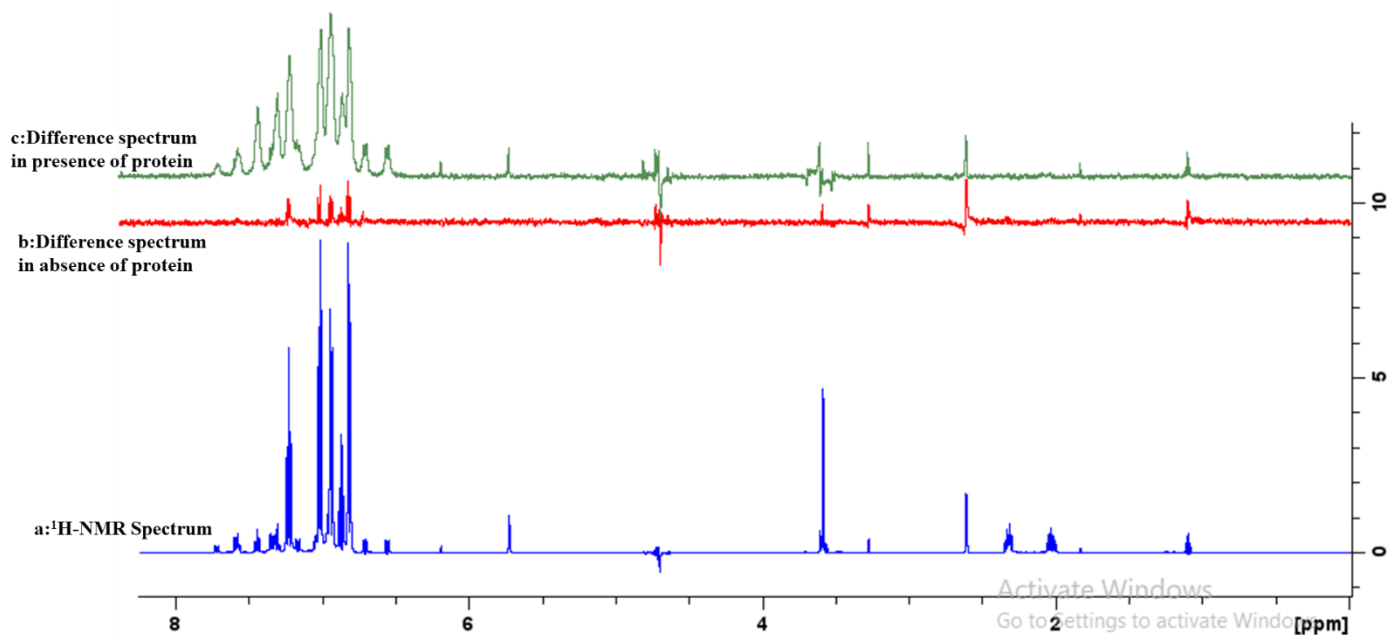

S5 Fig. STD-NMR Analysis of Mixture 4. a)  $^1\text{H}$  spectrum (blue) of the mixture, b) STD reference spectrum recorded in the absence of protein (red), c) STD difference spectrum recorded in the presence of  $10\ \mu\text{M}$  USP7 protein (green).

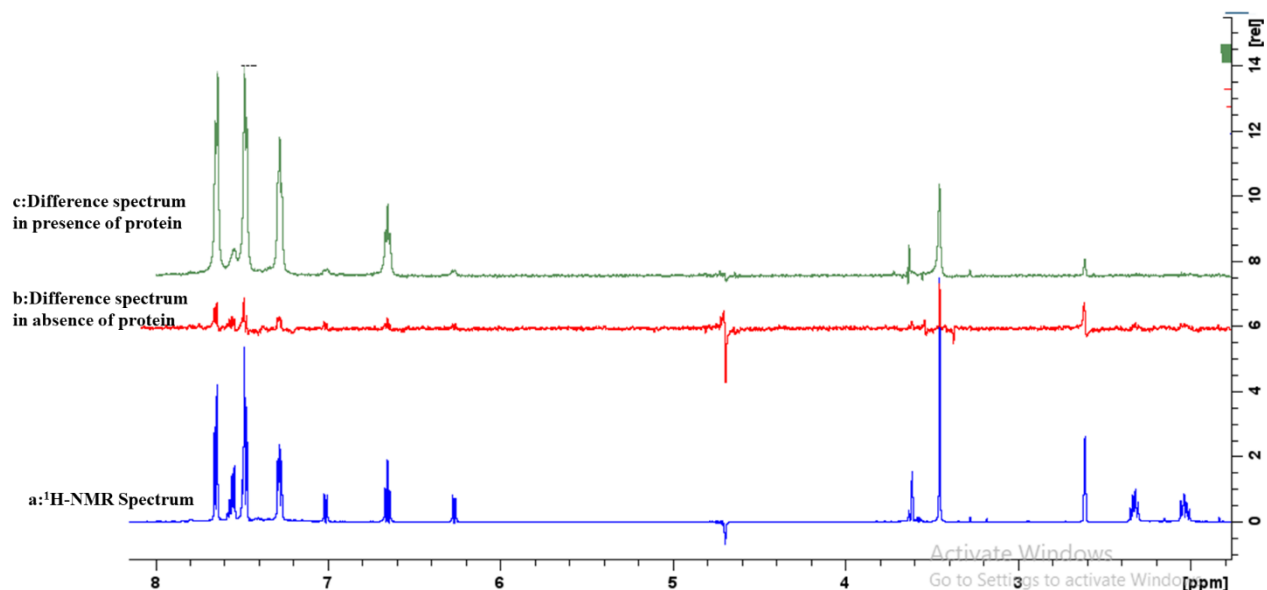

**S6 Fig. STD-NMR Analysis of Mixture 7.** a)  $^1\text{H}$  spectrum (blue) of the mixture, b) STD reference spectrum recorded in the absence of protein (red), c) STD difference spectrum recorded in the presence of  $10\ \mu\text{M}$  USP7 protein (green).

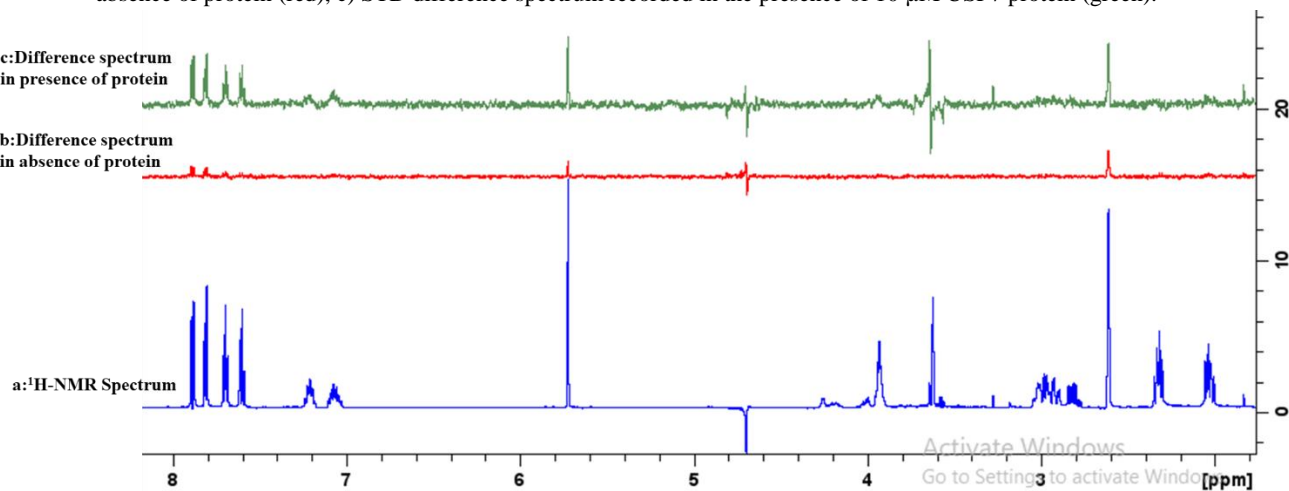

**S7 Fig. STD-NMR Analysis of Mixture 9.** a)  $^1\text{H}$  spectrum (blue) of the mixture, b) STD reference spectrum recorded in the absence of protein (red), c) STD difference spectrum recorded in the presence of  $10\ \mu\text{M}$  USP7 protein (green).

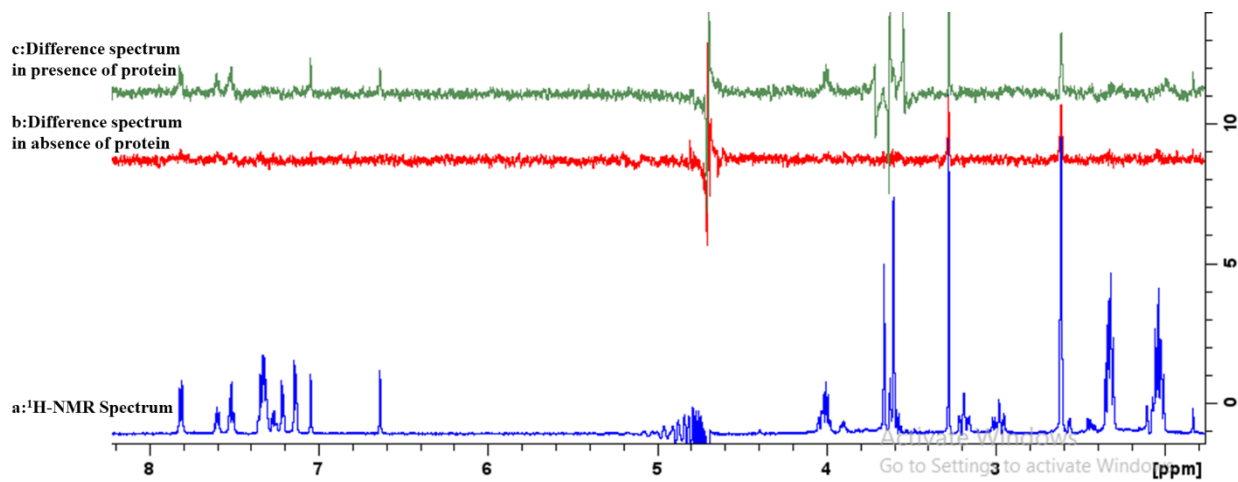

**S8 Fig. STD-NMR Analysis of Mixture 11.** a)  $^1\text{H}$  spectrum (blue) of the mixture, b) STD reference spectrum recorded in the absence of protein (red), c) STD difference spectrum recorded in the presence of  $10\ \mu\text{M}$  USP7 protein (green).

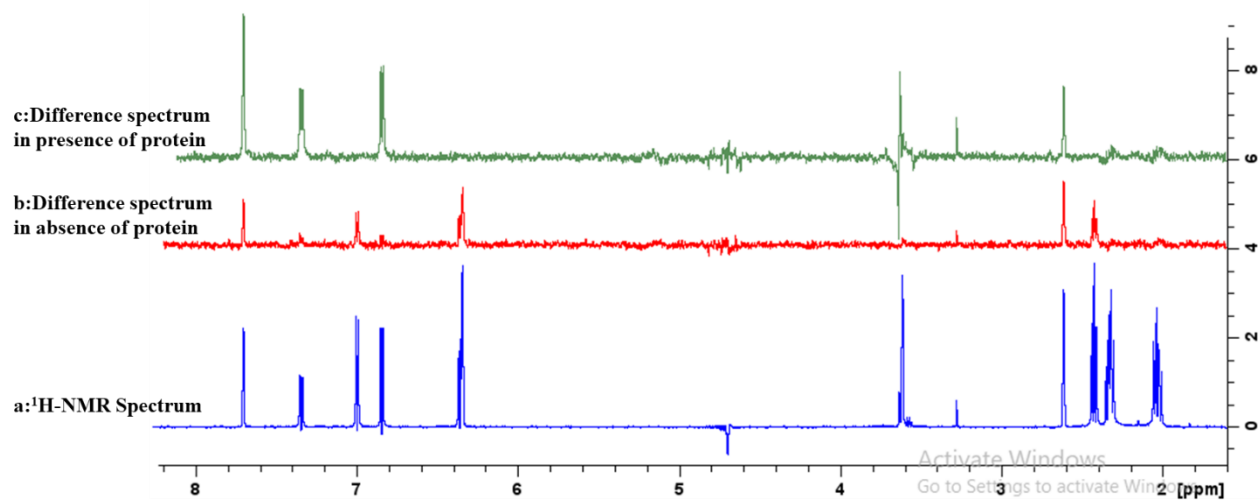

**S9 Fig. STD-NMR Analysis of Mixture 14.** a)  $^1\text{H}$  spectrum (blue) of the mixture, b) STD reference spectrum recorded in the absence of protein (red), c) STD difference spectrum recorded in the presence of  $10\ \mu\text{M}$  USP7 protein (green).

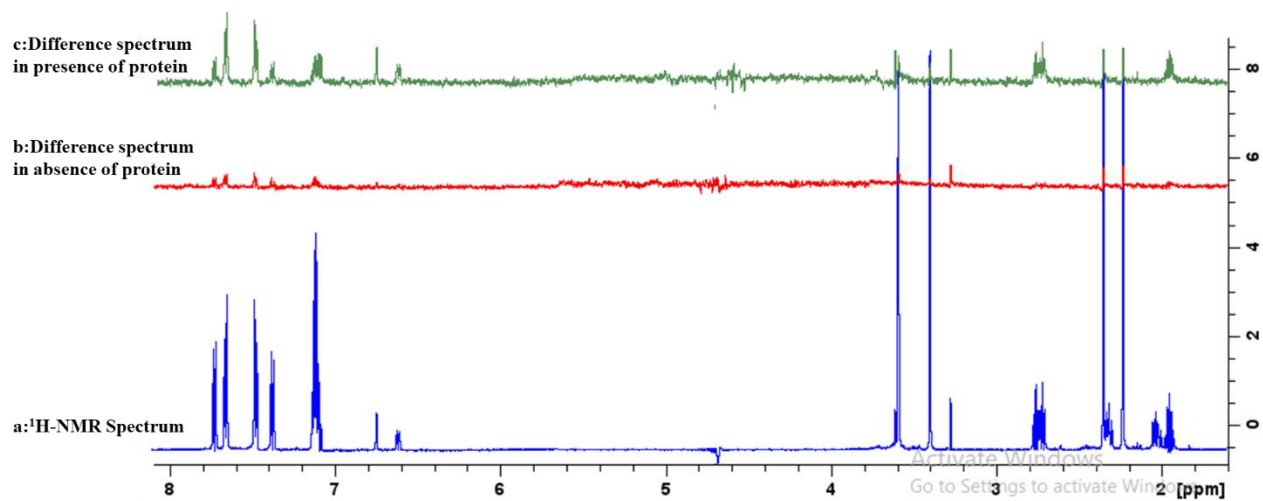

**S10 Fig. STD-NMR Analysis of Mixture 17.** a)  $^1\text{H}$  spectrum (blue) of the mixture, b) STD reference spectrum recorded in the absence of protein (red), c) STD difference spectrum recorded in the presence of  $10\ \mu\text{M}$  USP7 protein (green).

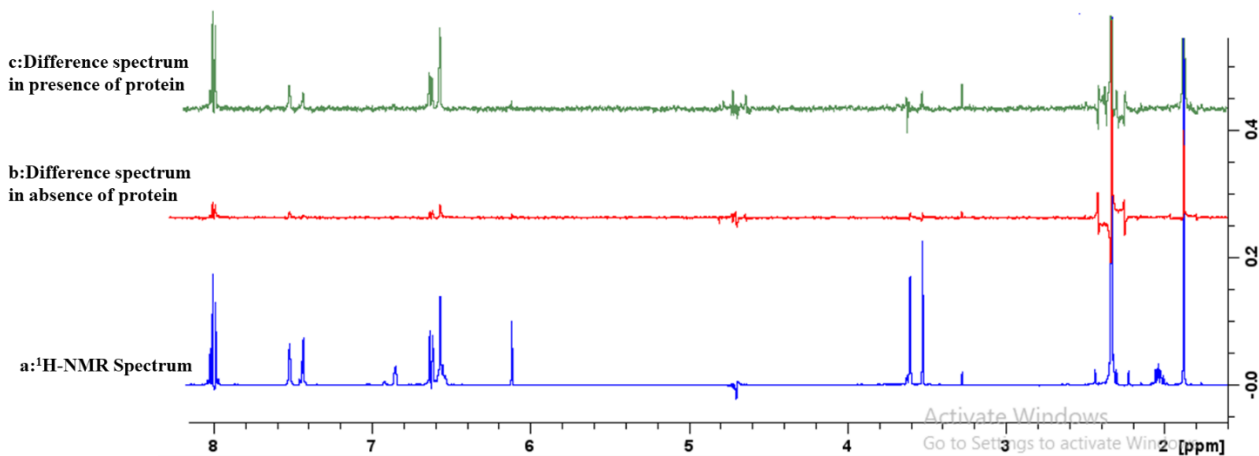

**S11 Fig. STD-NMR Analysis of Mixture 26.** a)  $^1\text{H}$  spectrum (blue) of the mixture, b) STD reference spectrum recorded in the absence of protein (red), c) STD difference spectrum recorded in the presence of  $10\ \mu\text{M}$  USP7 protein (green).

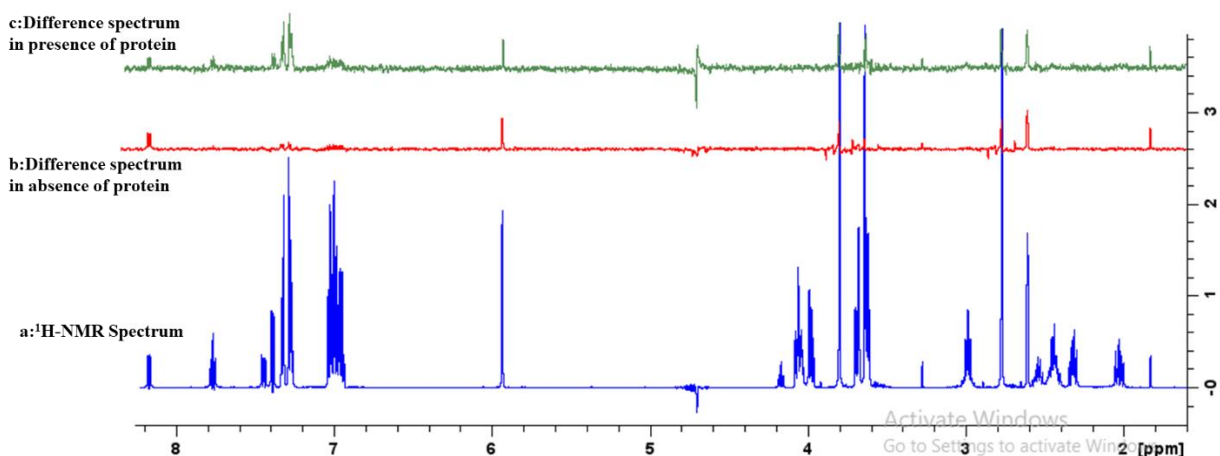

**S12 Fig. STD-NMR Analysis of Mixture 29.** a) <sup>1</sup>H spectrum (blue) of the mixture, b) STD reference spectrum recorded in the absence of protein (red), c) STD difference spectrum recorded in the presence of 10 μM USP7 protein (green).

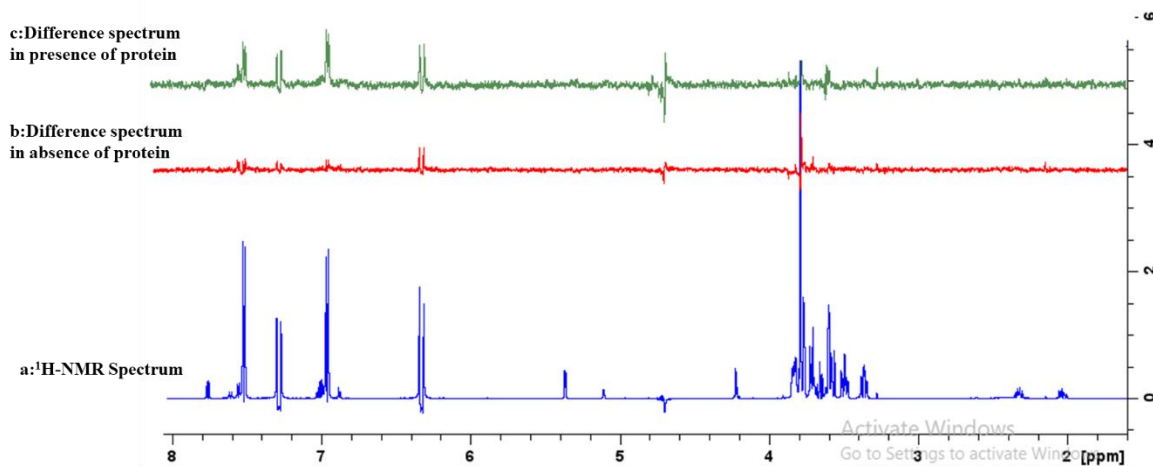

**S13 Fig. STD-NMR Analysis of Mixture 32.** a) <sup>1</sup>H spectrum (blue) of the mixture, b) STD reference spectrum recorded in the absence of protein (red), c) STD difference spectrum recorded in the presence of 10 μM USP7 protein (green).

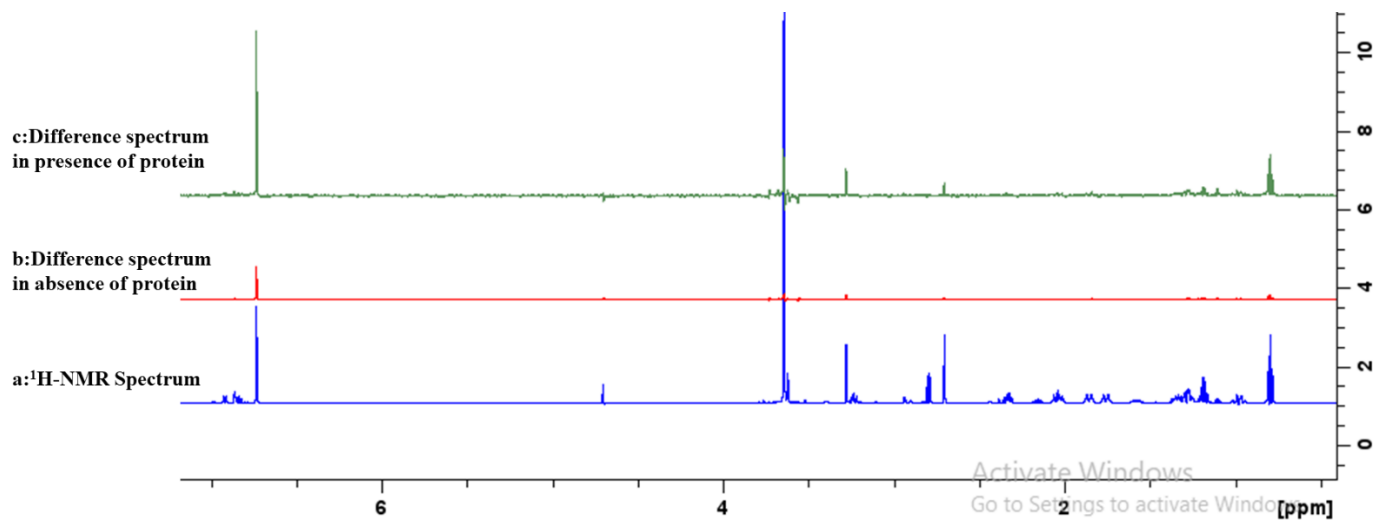

**S14 Fig. STD-NMR Analysis of Mixture 38.** a)  $^1\text{H}$  spectrum (blue) of the mixture, b) STD reference spectrum recorded in the absence of protein (red), c) STD difference spectrum recorded in the presence of  $10\ \mu\text{M}$  USP7 protein (green).

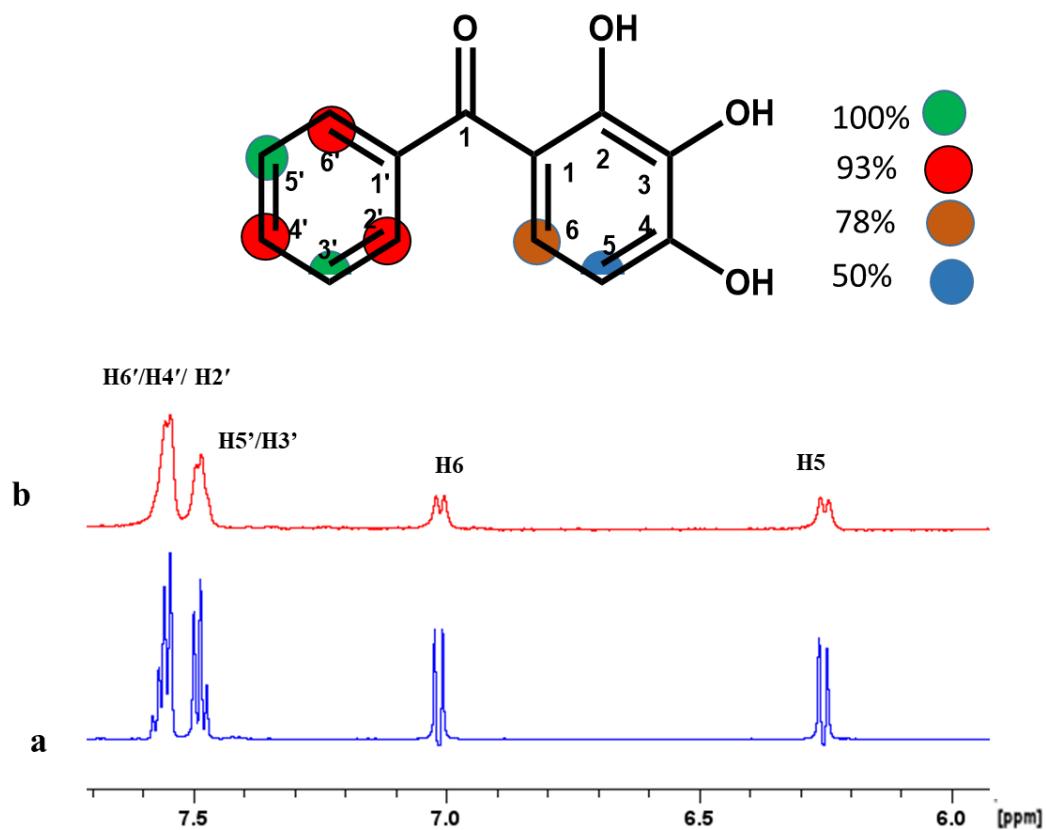

**S15a Fig. STD-NMR Analysis of Compound 3 with USP7-CD.** a) The  $^1\text{H}$  NMR of compound 3 (blue) and b) STD-difference spectrum of compound 3 recorded in the presence of  $10\ \mu\text{M}$  USP7 protein (red). Relative saturation of protons normalized with reference to proton  $\text{H}3'/\text{H}5'$  is represented with different color codes.



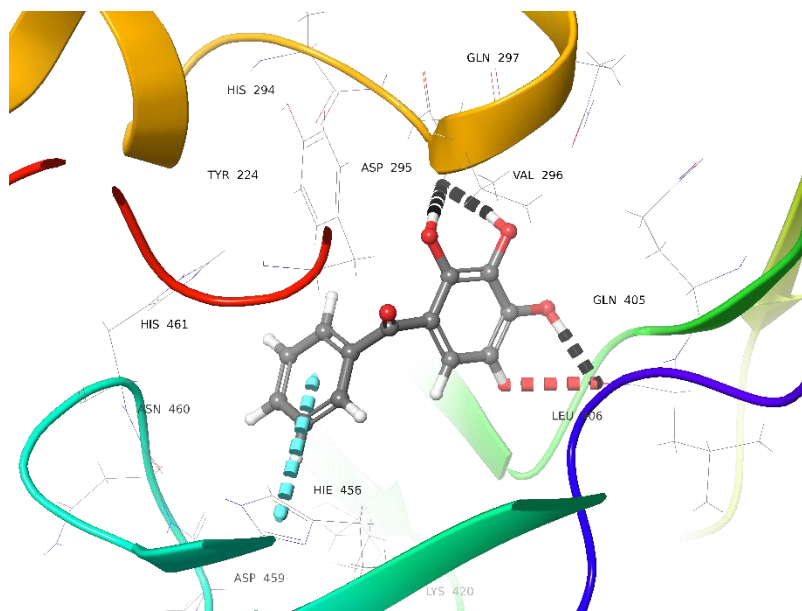

**S15b Fig. Ribbon Representation of USP7-CD with Compound 3:** The hydrogen bonds (black color) are shown with Asp295, and Leu406, while aromatic hydrogen bond (red color) with Leu406. The unsubstituted ring showed  $\pi$ - $\pi$  stacking interactions (blue color) with His456.

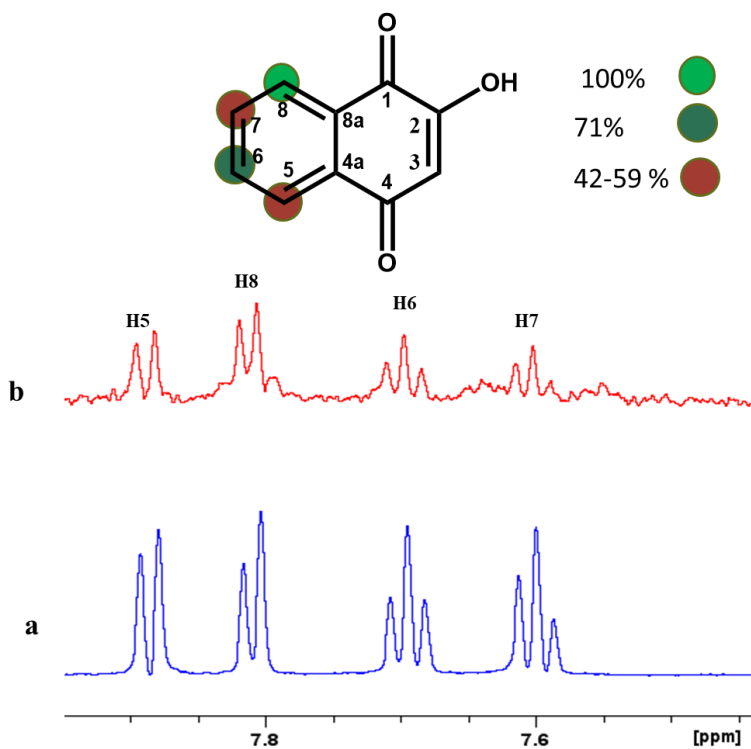

**S16a Fig. STD-NMR Analysis of Compound 4 with USP7-CD** a)  $^1\text{H}$  NMR spectrum (blue) of compound 4 b) STD difference spectrum of compound 4 recorded in the presence of 10  $\mu\text{M}$  USP7 protein (red). Relative saturation of protons normalized with reference to H6 is represented with different color codes.

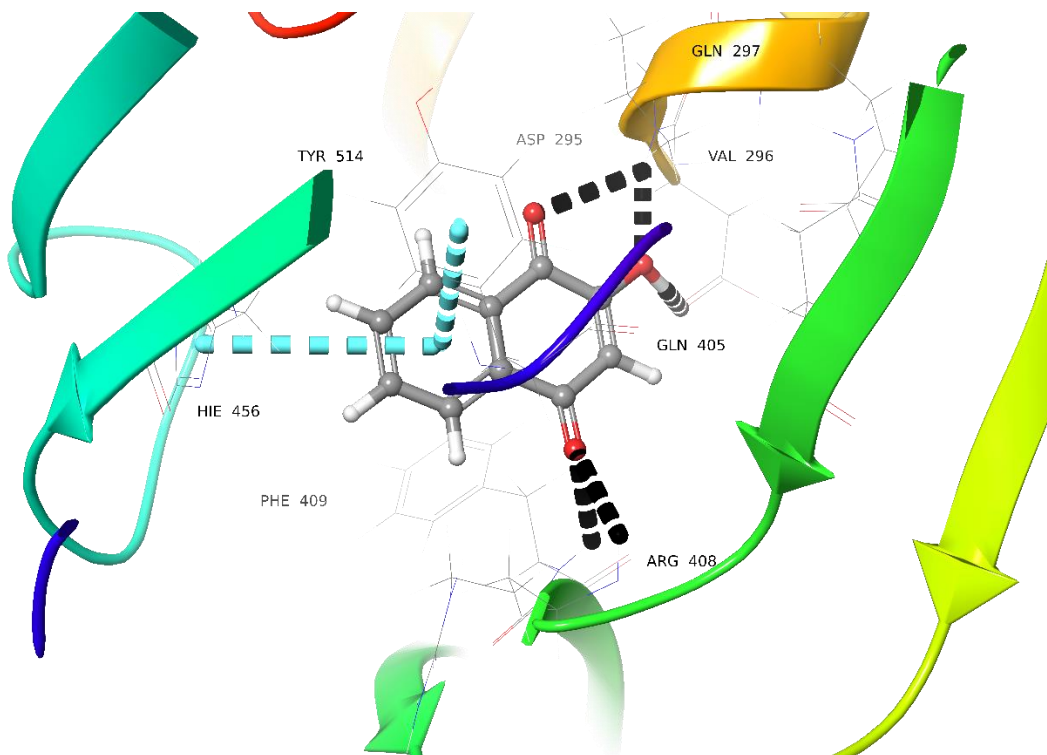

**S16b Fig. Ribbon Representation of USP7-CD with Compound 4:** The hydrogen bonds (black color) are shown with Asp295, Val296, Arg408, and Phe409. The aromatic ring showed two  $\pi$ - $\pi$  stacking interactions (blue color) with His461, and Tyr514.

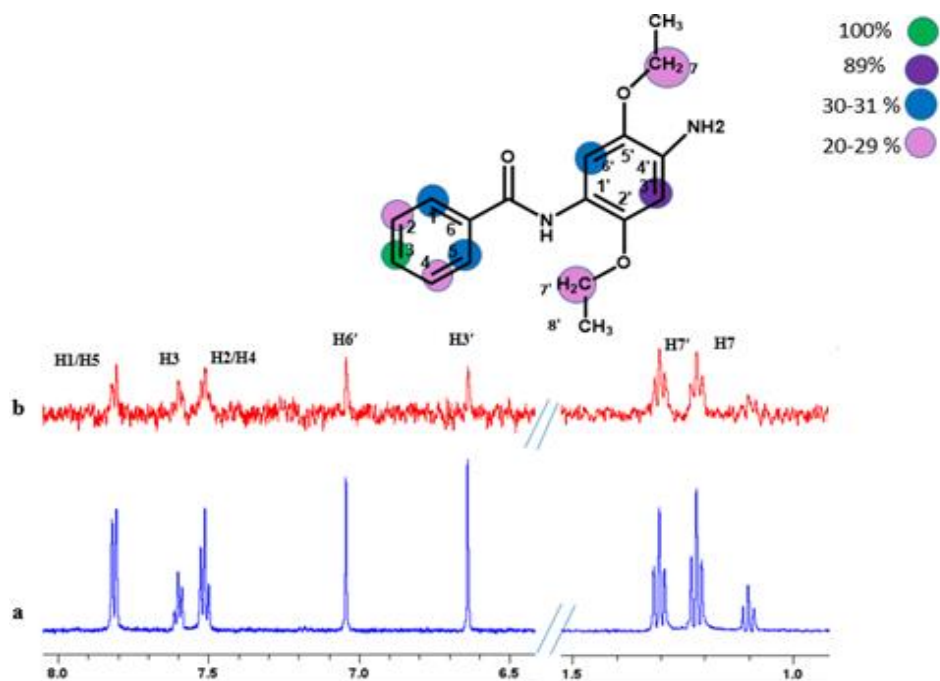

**S17a Fig. STD-NMR Analysis of Compound 5 with USP7-CD.** a)  $^1\text{H}$  NMR spectrum of compound 5 (blue) b) STD difference spectrum of compound 5 recorded in the presence of 10  $\mu\text{M}$  USP7 protein (red). Relative saturation of protons normalized with reference to H3 is represented with different color codes.

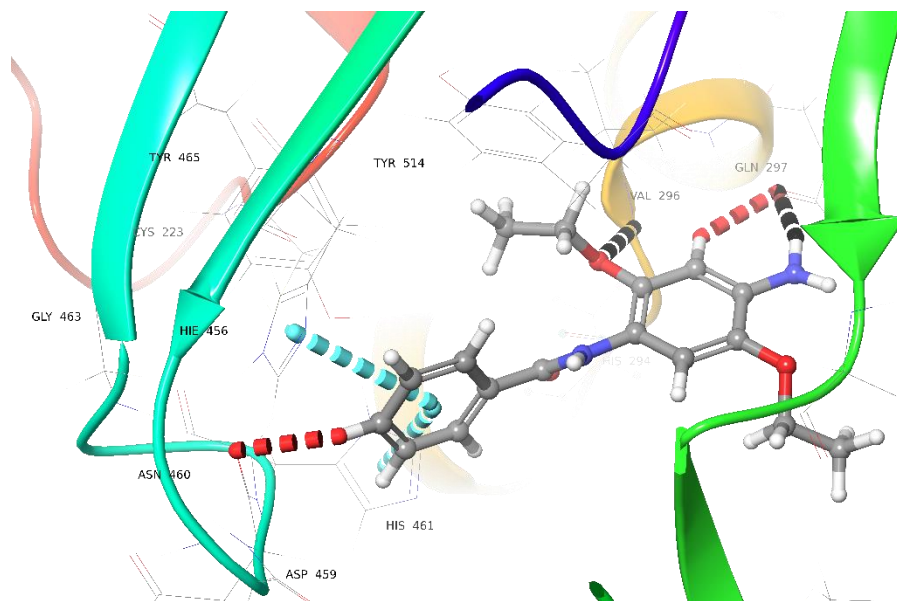

**S17b Fig. Ribbon Representation of USP7-CD with Compound 5:** The hydrogen bonds (black color) are shown with Val296, and Gln297, while aromatic hydrogen bond (red color) with Asn465, and Gln297. The unsubstituted ring showed two  $\pi$ - $\pi$  stacking interactions (blue color) with His461, and His456.

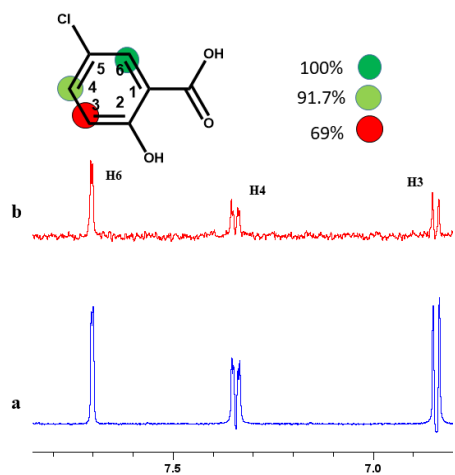

**S18a Fig. STD-NMR Analysis of Compound 6 with USP7-CD.** a)  $^1\text{H}$  NMR spectrum of compound 6 (blue) b) STD difference spectrum of compound 6 recorded in the presence of  $10\ \mu\text{M}$  USP7 protein (red). Relative saturation of protons normalized with reference to H6 is represented with different color codes.

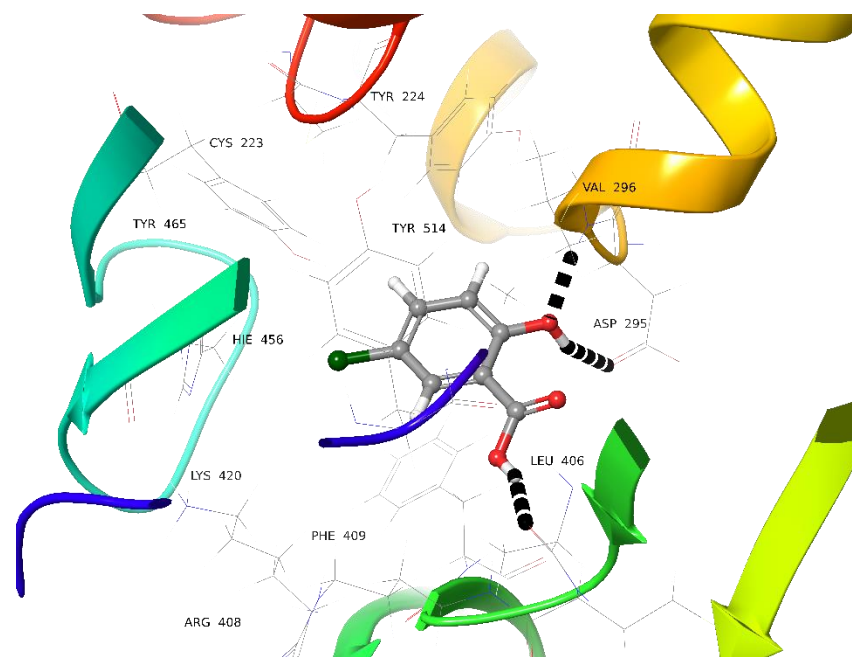

**S18b Fig. Ribbon Representation of USP7-CD with Compound 6:** The hydrogen bonds (black color) are shown with Val296, Asp295, and Leu406.

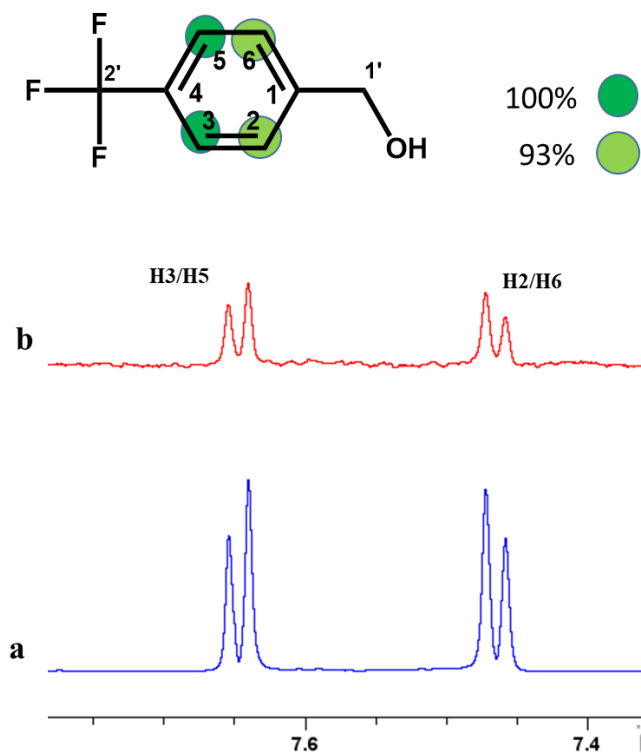

**S19a Fig. STD-NMR Analysis of compound 7 with USP7-CD.** a)  $^1\text{H}$  NMR spectrum of compound 7 (blue) b) STD difference spectrum of compound 7 recorded in the presence of  $10\ \mu\text{M}$  USP7 protein (red). Relative saturation of protons normalized with reference to H1' is represented with different color codes.

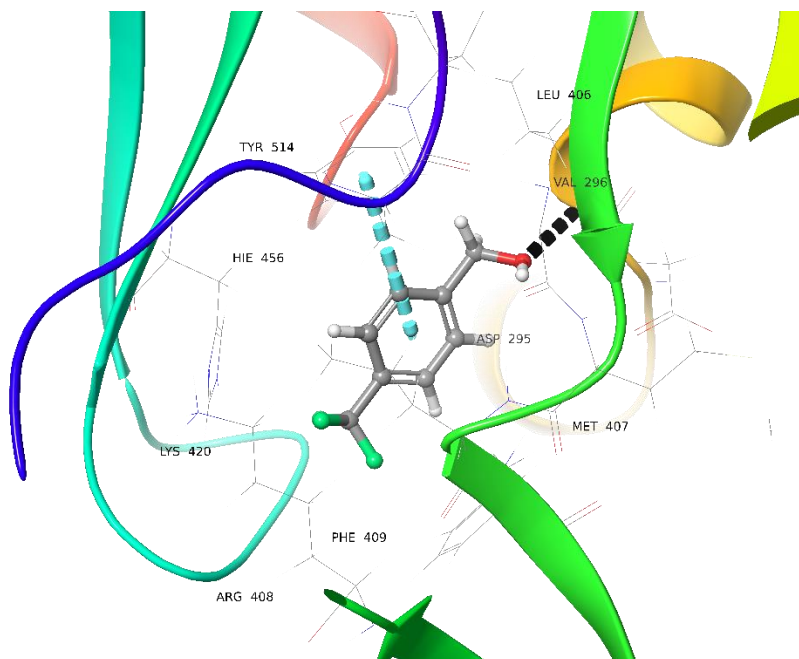

**S19b Fig. Ribbon Representation of USP7-CD with Compound 7:** The hydrogen bonds (black color) are shown with Val296. The aromatic ring showed two  $\pi$ - $\pi$  stacking interactions (blue color) with Tyr514.

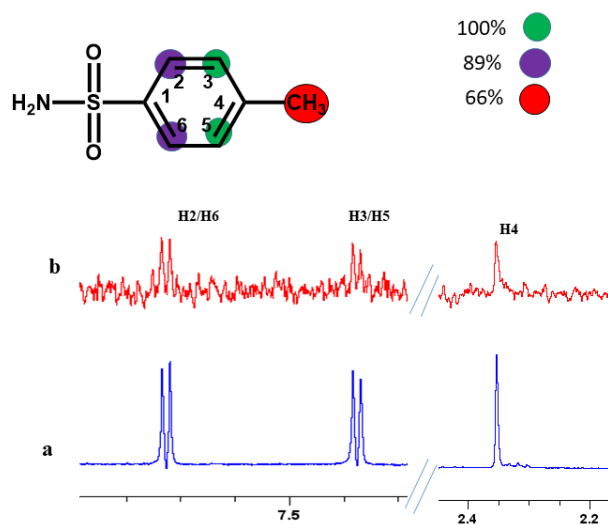

**S20a Fig. STD-NMR Analysis of Compound 8 with USP7-CD.** a)  $^1\text{H}$  NMR spectrum of compound **8** (blue) b) STD difference spectrum of compound **8** recorded in the presence of 10  $\mu\text{M}$  USP7 protein (red). Relative saturation of protons normalized with reference to H3/H5 is represented with different color codes.

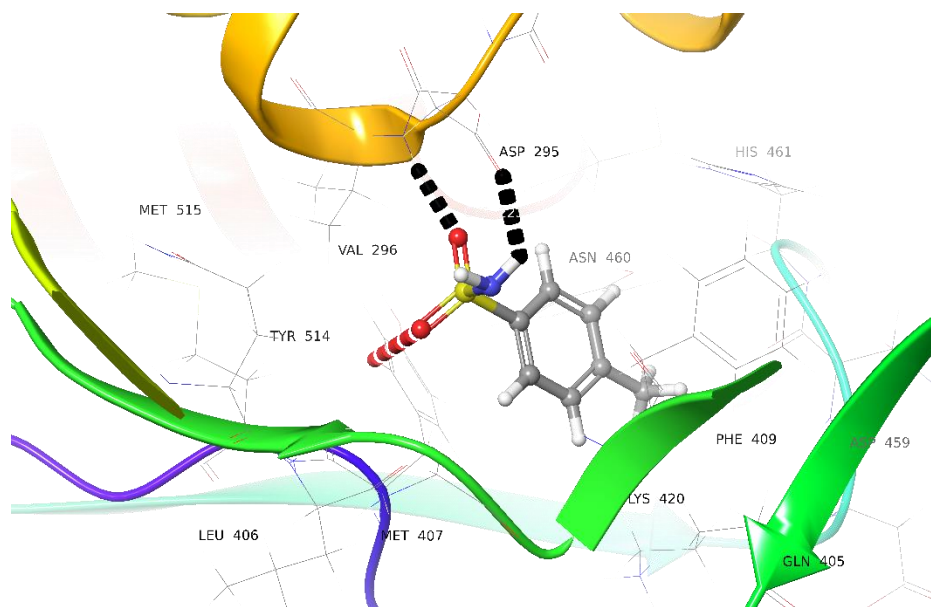

**S20b Fig. Ribbon Representation of USP7-CD with Compound 8:** The hydrogen bonds (black color) are shown with Val296, and Asp295, while aromatic hydrogen bond (red color) with Tyr514.

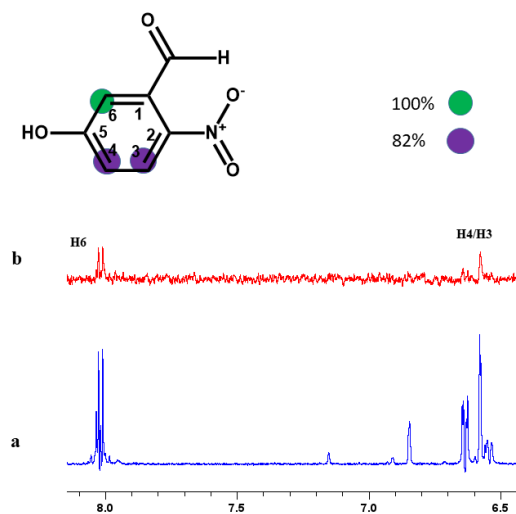

**S21a Fig. STD-NMR Analysis of Compound 9 with USP7-CD.** a)  $^1\text{H}$  NMR spectrum of compound 9 (blue) b) STD difference spectrum of compound 9 recorded in the presence of  $10\ \mu\text{M}$  USP7 protein (red). Relative saturation of other protons normalized with reference to H6 is represented with different color codes.

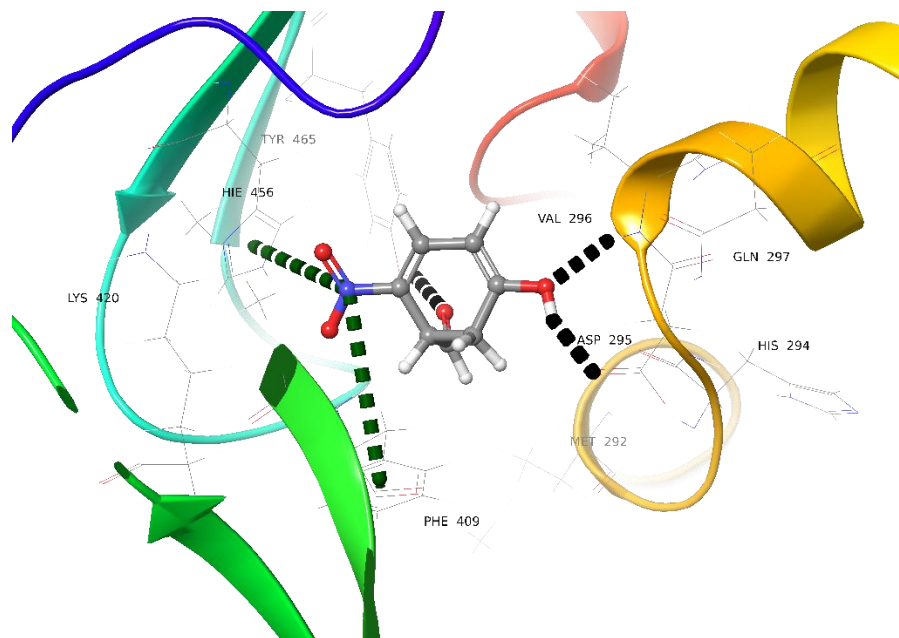

**S21b Fig. Ribbon Representation of USP7-CD with Compound 9:** The hydrogen bonds (black color) are shown with Val296, Asp295, and Tyr465. The aromatic ring showed two  $\pi$ -cationic interactions (green color) with Phe409, and His456.

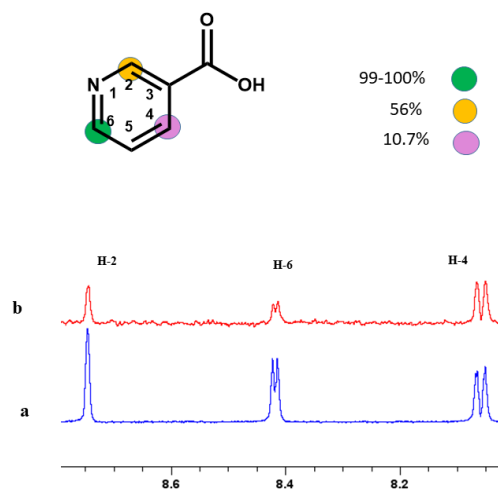

**S22a Fig. STD-NMR Analysis of Compound 10 with USP7-CD.** a)  $^1\text{H}$  NMR spectrum of compound **10** (blue) b) STD difference spectrum of compound **10** recorded in the presence of  $10\ \mu\text{M}$  USP7 protein (red). Relative saturation of protons normalized with reference to H6 is represented with different color codes.

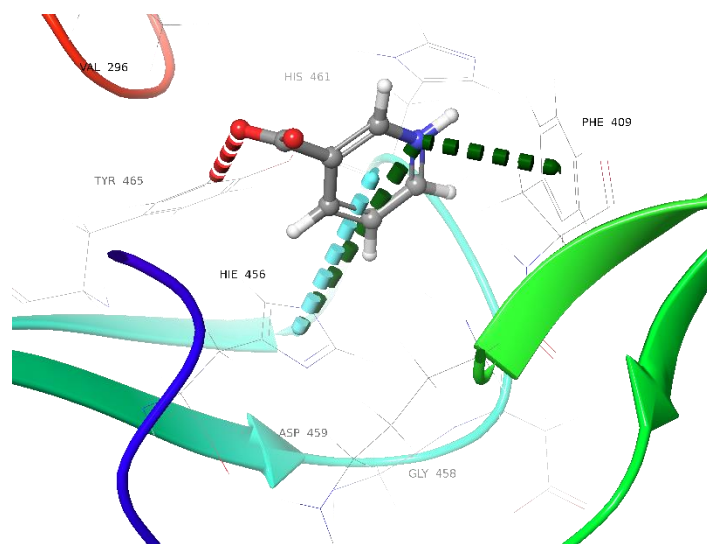

**S22b Fig. Ribbon Representation of USP7-CD with Compound 10:** The aromatic hydrogen bond (red color) are shown with Tyr 465, the nitrogen showed  $\pi$ -cationic interactions (green color) with Phe409, and His456, the aromatic ring showed  $\pi$ -  $\pi$  interactions (blue color) with His456.

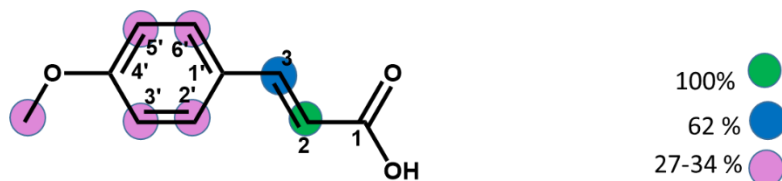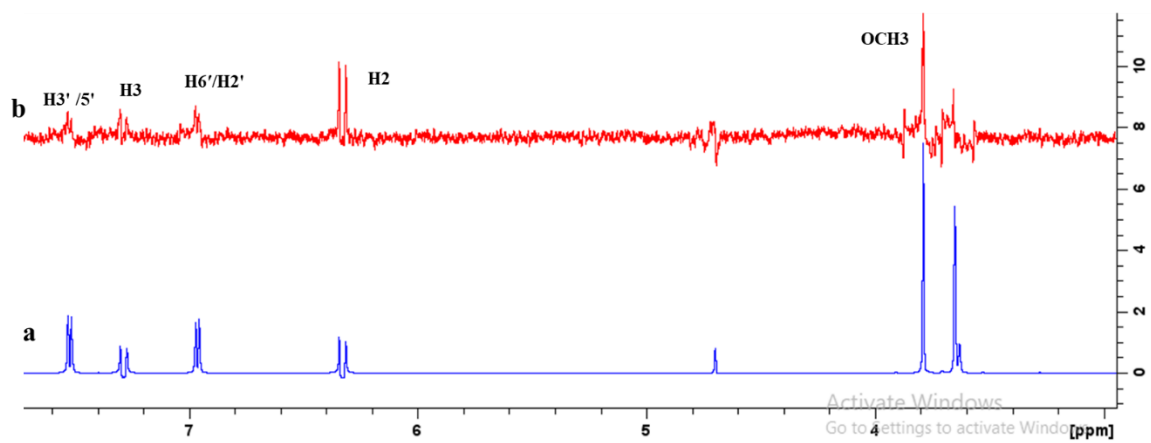

**S23a Fig. STD-NMR Analysis of Compound 11 with USP7-CD.** a)  $^1\text{H}$  NMR spectrum (blue) b) STD difference spectrum recorded in the presence of  $10\ \mu\text{M}$  USP7 protein (red). Relative saturation of protons normalized with reference to H6 is represented with different color codes.



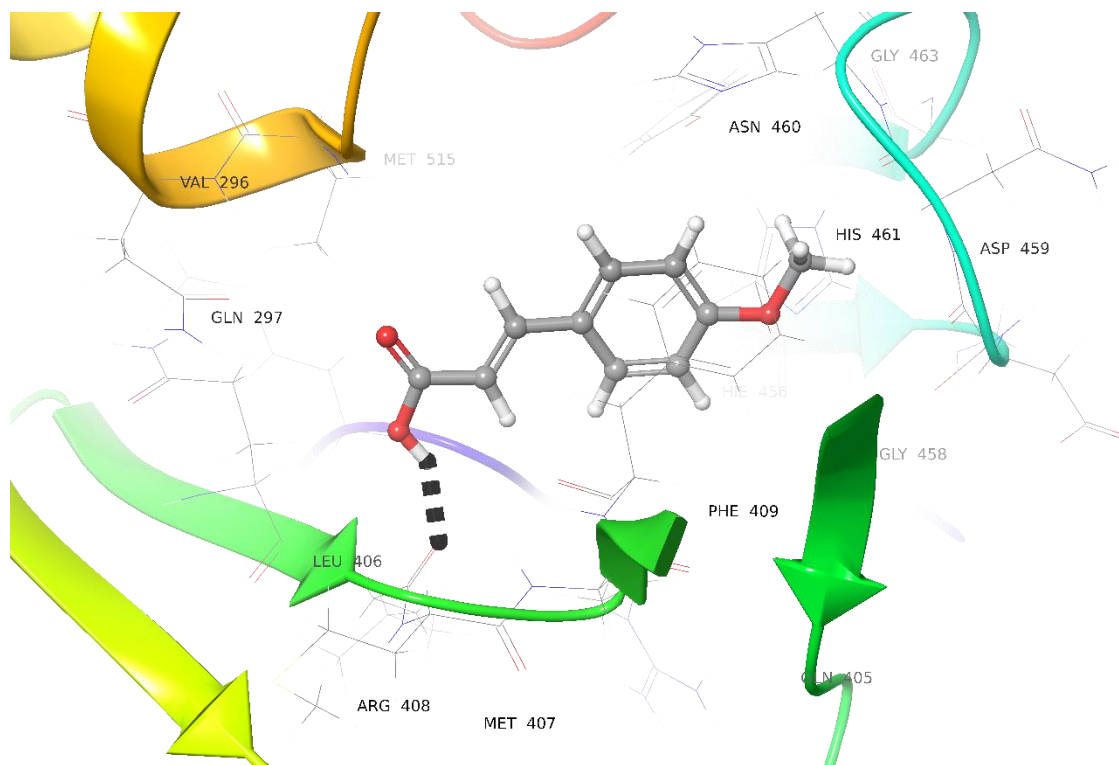

**S23b Fig. Ribbon Representation of USP7-CD with Compound 11:** The hydrogen bond (black color) is shown with Leu406.

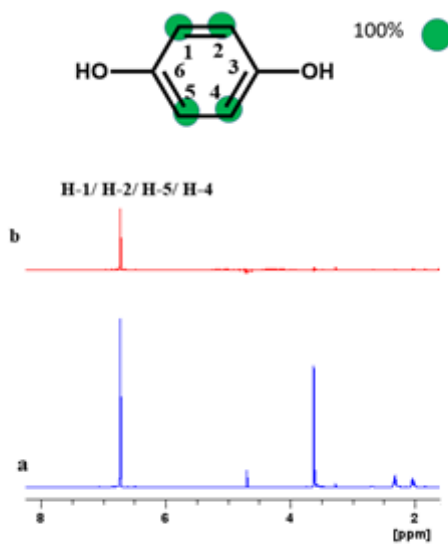

**S24a Fig. STD-NMR Analysis of Compound 12 with USP7-CD.** a)  $^1\text{H}$ -NMR spectra of the compound **12** (blue), b) STD difference spectrum compound **12** recorded in the presence of 10  $\mu\text{M}$  USP7 protein (red).

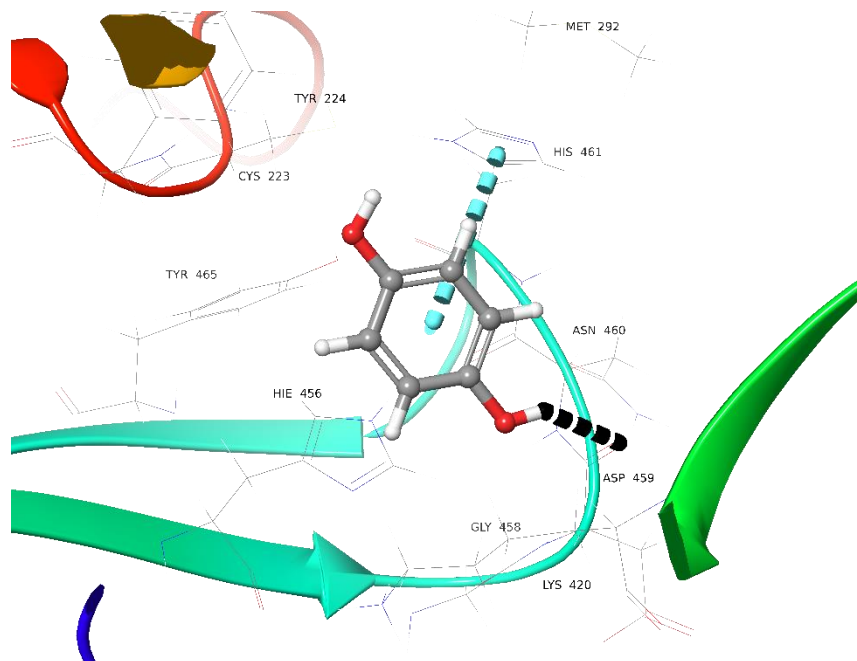

**S24b Fig. Ribbon Representation of USP7-CD with Compound 12:** The hydrogen bonds (black color) is shown with Asp459, while  $\pi$ - $\pi$  stacking interactions (blue color) with His461.

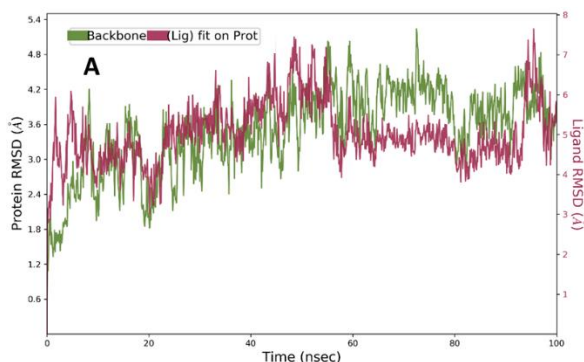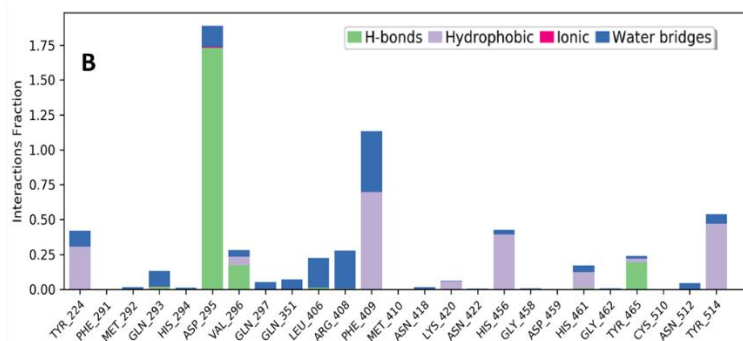

**S25 Fig. RMSD plots of USP7 (green color), and compound 3 (red color) indicating the evolution of protein-ligand complex for 100 nsec, (B) Histogram of the fraction of time for which non-covalent interactions were retained between the residues of USP7 and compound 3.**

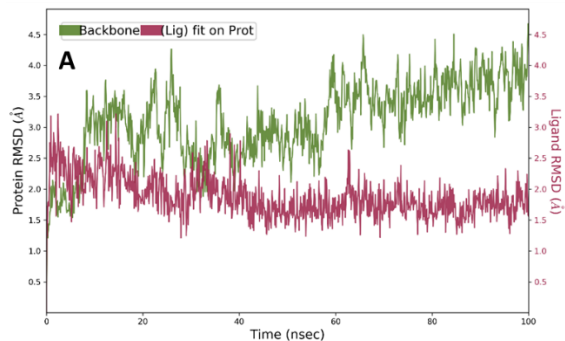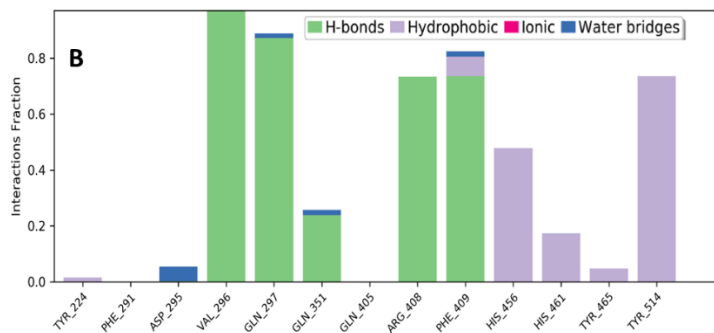

**S26 Fig. RMSD plots of USP7 (green color), and compound 4 (red color) indicating the evolution of protein-ligand complex for 100 nsec, (B) Histogram of the fraction of time for which non-covalent interactions were retained between the residues of USP7**

and compound 4.

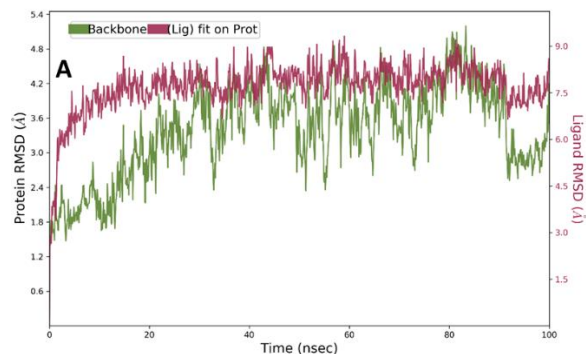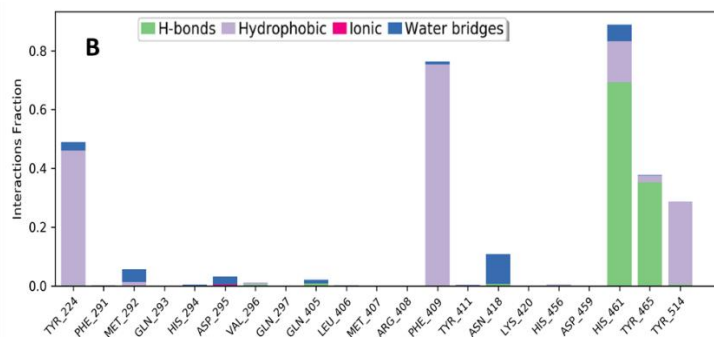

**S27 Fig.** RMSD plots of USP7 (green color), and compound 5 (red color) indicating the evolution of protein-ligand complex for 100 nsec, (B) Histogram of the fraction of time for which non-covalent interactions were retained between the residues of USP7 and compound 5.

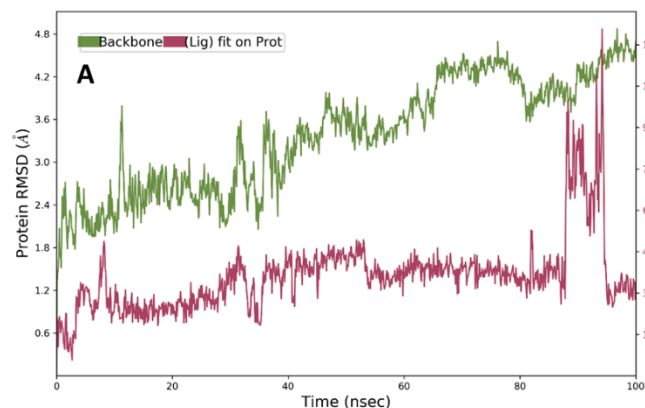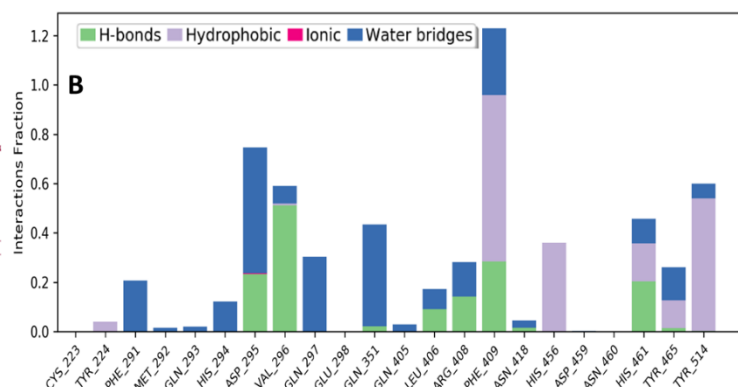

**S28 Fig.** RMSD plots of USP7 (green color), and compound 6 (red color) indicating the evolution of protein-ligand complex for 100 nsec, (B) Histogram of the fraction of time for which non-covalent interactions were retained between the residues of USP7 and compound 6.

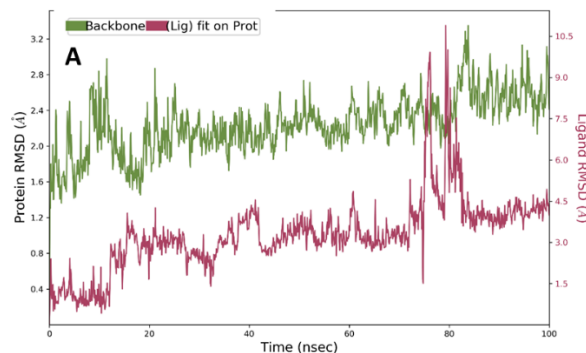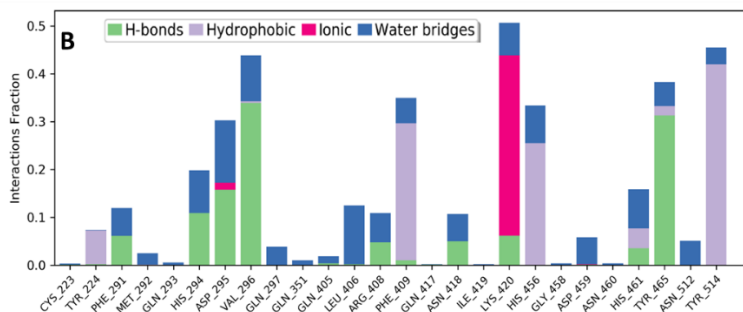

**S29 Fig.** RMSD plots of USP7 (green color), and compound 9 (red color) indicating the evolution of protein-ligand complex for 100 nsec, (B) Histogram of the fraction of time for which non-covalent interactions were retained between the residues of USP7 and compound 9.





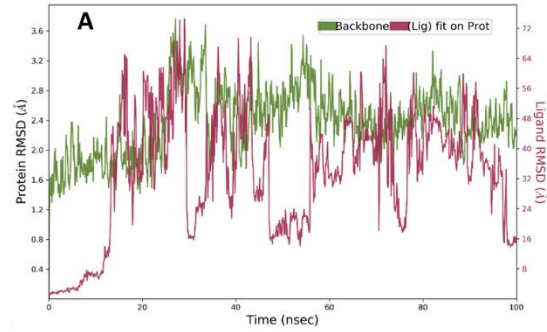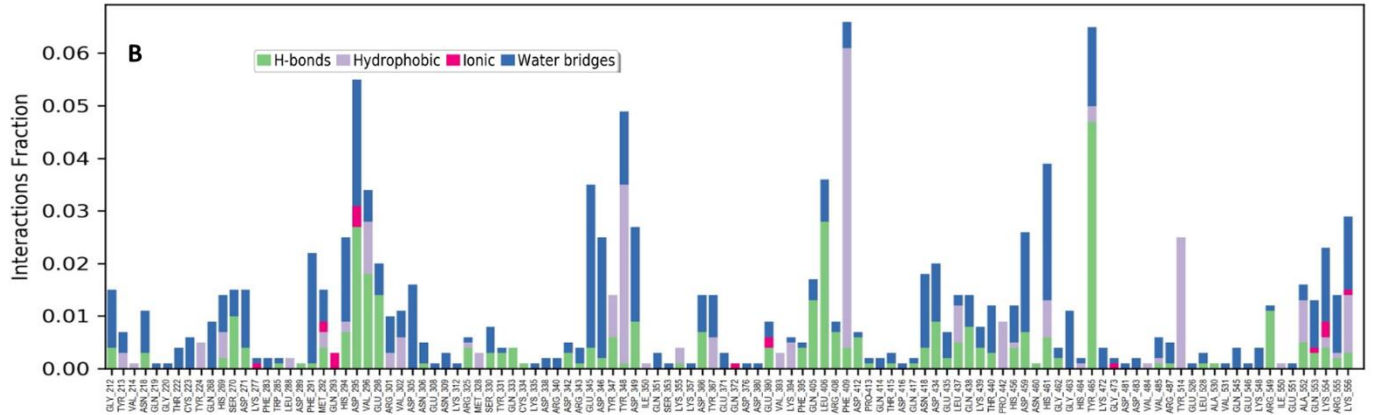

**S34 Fig.** RMSD plots of USP7 (green color), and compound **12** (red color) indicating the evolution of protein-ligand complex for 100 nsec, (B) Histogram of the fraction of time for which non-covalent interactions were retained between the residues of USP7 and compound **12**.

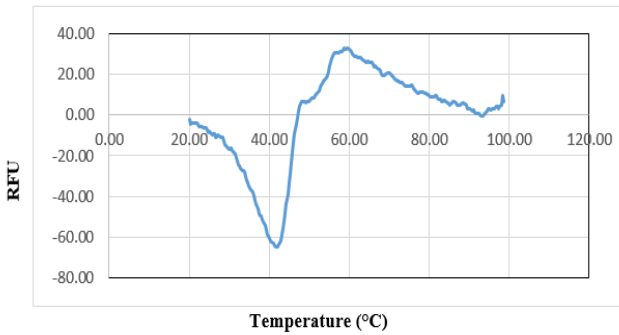

**S35 Fig. The Thermal Shift Profile of USP Protein.** The blue line in the figure represents the thermal profile of the protein when subjected to a temperature range from 20 to 99°C indicating a  $T_m$  of 45 °C for USP7-CD.

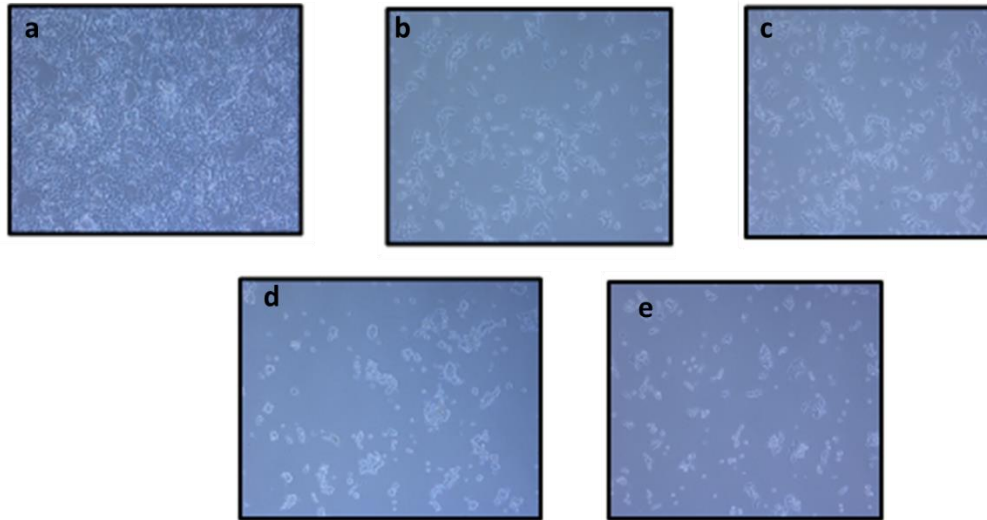

**S36 Fig. Morphology of HCT-116 cells.** a) shows control cells, b) compound 2 treated cells, c) compound 3 treated cells, d) compound 5 treated cells, and e) compound 12 treated cells.

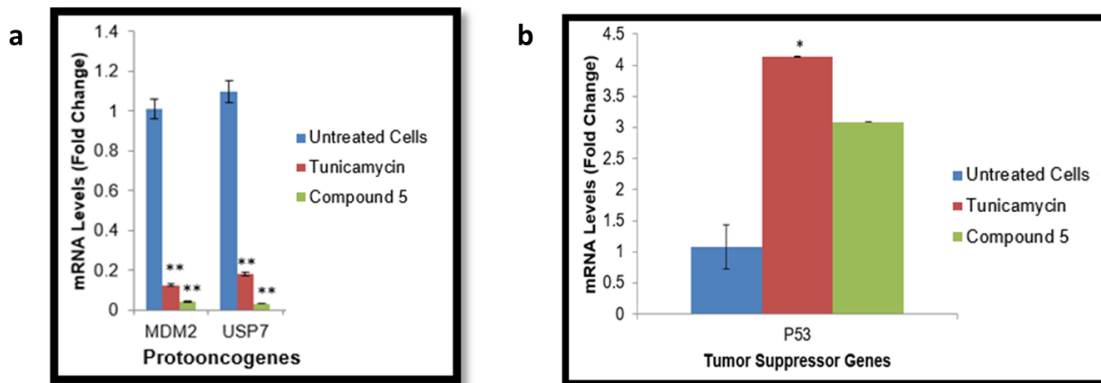

**S37 Fig. Effect of compound 5 on the mRNA expression of proto-oncogene and tumor suppressor gene.** a) mRNA expression of

proto-oncogenes USP7 and MDM2 (b) mRNA expression of tumor-suppressive gene p53 (\* $P \leq 0.05$ , and \*\* $P \leq 0.01$ ).

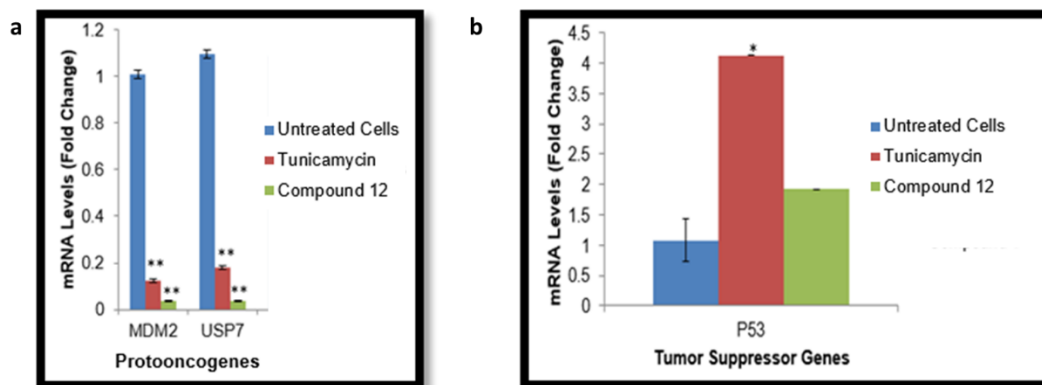

**S38 Fig. Effect of compound 12 on the expression of proto-oncogene and tumor suppressor gene.** a) mRNA expression of proto-oncogenes USP7 and MDM2 (b) mRNA expression of tumor-suppressive gene p53 (\* $P \leq 0.05$ , and \*\* $P \leq 0.01$ ).
