# Supplementary material for: Identification of new leads against ubiquitin specific protease-7 (USP7): a step towards the potential treatment of cancers
Source: Royal Society of Chemistry journal article supplement (doi:10.1039/d4ra06813k), 2024-01-01
Supplement: d4ra06813k2.pdf [file d4ra06813k2.pdf]

**S1 Table:** List of Mixtures with information about Compounds

| Mixture No. | Compound Name                                                                                                                                            |
|-------------|----------------------------------------------------------------------------------------------------------------------------------------------------------|
| Mixture 1   | 2-(carboxymethyl)benzoic acid<br>catechin hydrate (compound 1).                                                                                          |
| Mixture 2   | Tetrahydroxy-1,4-quinone monohydrate<br>sodium (4-( <i>N</i> -thiazol-2-ylsulfamoyl) phenyl)<br>amide<br>Indanol<br>Thymol                               |
| Mixture 3   | D, <i>L</i> -Camphene<br>(+)-Menthofuran<br>Plumbagin<br>Sclareol                                                                                        |
| Mixture 4   | 3,4-dihydroxy- <i>L</i> -phenylalanine, 2-<br>benzylphenol, and 4-(phenyl amino)phenol<br>(compound 2)                                                   |
| Mixture 5   | 2,2,6,6-tetramethyl-4-piperidinol<br>3-hydroxypyridine<br>3-Hydroxy-4-methoxybenzyl alcohol<br>sodium (4-aminophenylsulfonyl)<br>(quinoxalin-2-yl) amide |
| Mixture 6   | Troloxerutin; 3', 4', 7-Tris[O-(2-hydroxyethyl)<br>rutin<br>2,2,6-trimethylpiperidin-4-one hydrochloride<br>3-ethoxy-4-hydroxybenzaldehyde               |
| Mixture 7   | bromofenac sodium,<br>2,3,4-trihydroxybenzophenone (Compound 3).                                                                                         |
| Mixture 8   | 1-Hydroxy-2-naphthoic acid<br>8-hydroxyquinoline-5-sulfonic acid mono<br>hydrate<br>3-hydroxypyridine<br>2,2,6,6-tetramethyl-4-piperidinol               |
| Mixture 9   | sitagliptin and 4-hydroxynaphthalene-1,2-dione<br>(Compound 4).                                                                                          |
| Mixture 10  | 3-hydroxy-4-nitrobenzoic acid<br>(2,2,6-trimethylpiperidin-4-one hydrochloride<br>(Ethoxymethylene-malononitrile<br>Cholesteryl acetate                  |
| Mixture 11  | desloratadine and <i>N</i> -(4-amino-2,5-<br>diethoxyphenyl)benzamide<br>(compound 5)                                                                    |
| Mixture 12  | Nimesulide<br>( <i>p</i> -Toluidine hydrochloride                                                                                                        |
| Mixture 13  | (+)-Bicuculline<br>Baicalein                                                                                                                             |

|            |                                                                                                                                                                          |
|------------|--------------------------------------------------------------------------------------------------------------------------------------------------------------------------|
|            | Sesamol<br>(-)-Nicotine pestanal                                                                                                                                         |
| Mixture 14 | 5-Chloro salicylic acid, (Compound 6)<br>4-Hexylresorcinol                                                                                                               |
| Mixture 15 | Salicylaldehyde hydrazine<br><i>Bis (m-nitro phenyl) Disulfide</i>                                                                                                       |
| Mixture 16 | Biphenyl-2-carboxylic acid<br>3,5-dimethoxy-4-hydroxy benzaldehyde<br>m-methoxycinnamic acid<br>(4-biphenyl)-2-propanol                                                  |
| Mixture 17 | (4-(trifluoromethyl)phenyl) methanol,<br>compound 7,<br>4-methylbenzenesulfonamide, compound 8,<br><i>p</i> -tolyl acetic acid,<br>5-indanol.                            |
| Mixture 18 | 1-Amino-2-naphthol-4-sulfonic Acid<br>3-Amino-4-methoxybenzamide<br>Alizarin(1,2-Dihydroxy-anthraquinone)<br>Anisic Acid (4-Methoxybenzoic acid)                         |
| Mixture 19 | 3-Bromo-4-chlorobenzotrifluoride<br>5-Bromo-3-hydroxyoxindole<br>2-Bromo-4,5-methylenedioxcinnamic Acid<br>(5(4)-amino-4(5)- (amino carbonyl)-imidazole<br>hydrochloride |
| Mixture 20 | 2,4,6-tribromoaniline<br>4,4' BiPiperidyldihydrochloride<br><i>p</i> -Thiocresol<br>2-Mercaptopyridine N-oxide-sodium salt<br>hydrate                                    |
| Mixture 21 | Benzyl Carbamate<br>Salicylaldehyde hydrazine<br>Methyl gallate                                                                                                          |
| Mixture 23 | (-)- <i>N, N, N</i> -Tetramethyl-D-tartaramide ( <i>L</i> (-)-<br>thiazolidine-4-carboxylic acid:<br>(2-oxo-2 <i>H</i> -chromene-3-carboxylic acid                       |
| Mixture 24 | 4-Hydroxy-3-methoxybenzyl alcohol:<br>3,7-dimethyl-1 <i>H</i> -purine-2,6(3 <i>H</i> ,7 <i>H</i> )-dione:                                                                |
| Mixture 25 | Cresol red<br>( <i>E</i> )-2-hydroxy-5-((4-( <i>N</i> -pyridin-2-ylsulfamoyl)<br>phenyl) diazenyl) benzoic acid:<br>( <i>L</i> (-) Menthol :                             |
| Mixture 26 | 5-hydroxy-2-nitrobenzaldehyde, compound 9,<br>2,3,5,6-tetramethyl pyrazine, 3-(trifluoromethyl)<br>phenyl acetic acid, and 2,3,5,6-<br>tetramethylbenzene-1,4-diamine.   |
| Mixture 27 | 2-mercaptopyrimidine<br>1,3,5-triazine-2,4,6-triamine<br>1-naphthol-3,6-disulfonic acid, disodium salt<br>5-chloro-8-hydroxyquinoline                                    |

|            |                                                                                                                                                                                              |
|------------|----------------------------------------------------------------------------------------------------------------------------------------------------------------------------------------------|
| Mixture 28 | 4-hydroxy-3-nitronaphthalene-1-sulfonic acid tetra hydrate:<br>(4-hexylbenzene-1,3-diol:<br>(Sodium ( <i>E</i> )-4,5-dihydroxy-3-((4-sulfonatophenyl) diazenyl) naphthalene-2,7-disulfonate: |
| Mixture 29 | guaifenesin, clioquinol, nicotinic acid compound <b>10</b> , and serotonin HCl.                                                                                                              |
| Mixture 30 | ( <i>p</i> -Tolyl-hydrazine hydrochloride:<br>(3-Bromo-5-chloro Salicylaldehyde:<br>(2-Bromo-5-fluorobenzaldehyde:                                                                           |
| Mixture 31 | (3-(4-hydroxyphenyl)-propionic acid<br>(4-Ethyl benzoic acid                                                                                                                                 |
| Mixture 32 | Salicin<br>(4-[4-(trifluoromethyl)-phenoxy] phenol:<br>2-mercaptonicotinic acid<br><i>p</i> -Methoxycinnamic acid (Compound <b>11</b> )                                                      |
| Mixture 33 | (2-(4-biphenyl)-2-propanol:<br>(Nicotinic acid:                                                                                                                                              |
| Mixture 34 | (4-Amino-2,6-dibromophenol<br>(2- <i>n</i> -propylphenol                                                                                                                                     |
| Mixture 35 | ( <i>N</i> -(Benzyloxycarbonyloxy) succinimide<br>(2. 2-amino- <i>p</i> -cresol                                                                                                              |
| Mixture 36 | (Bis(4-hydroxyphenyl)sulfide<br>(Phloroglucinol dehydrate                                                                                                                                    |
| Mixture 37 | (Benzoin<br>(Anisic Acid (4-Methoxybenzoic acid                                                                                                                                              |
| Mixture 38 | hydroquinone compound <b>12</b> )<br>Vitamin A Palmitate                                                                                                                                     |

**S2 Table:** Cytotoxic activity of compounds towards BJ and HCT116 Cells

| Compound             | BJ Cell line | HCT-116   | IC <sub>50</sub> ± SEM (μM) |
|----------------------|--------------|-----------|-----------------------------|
| Compound 1           | NC*          | NC        | -                           |
| Compound 2           | NC           | Cytotoxic | 81.9 ± 0.39                 |
| Compound 3           | NC           | Cytotoxic | 222.5 ± 8.1                 |
| Compound 4           | NC           | NC        | -                           |
| Compound 5           | NC           | Cytotoxic | 143 ± 1.94                  |
| Compound 6           | NC           | NC        | -                           |
| Compound 7           | NC           | NC        | -                           |
| Compound 8           | NC           | NC        | -                           |
| Compound 9           | NC           | NC        | -                           |
| Compound 10          | NC           | NC        | -                           |
| Compound 11          | NC           | NC        | -                           |
| Compound 12          | NC           | Cytotoxic | 31.11 ± 9.9                 |
| <b>Tunicamycin</b>   | -            | Cytotoxic | <b>0.22 ± 0.78</b>          |
| <b>Cyclohexamide</b> | Cytotoxic    | -         | <b>0.20 ± 0.10</b>          |

Tunicamycin was used as a reference compound against HCT116 cells while Cyclohexamide was used as reference compound against BJ cells,

(NC\*= non- cytotoxic).

**S3 Table:** Sequence of genes studied for the RT-PCR

| Primer for gene | Sequence                       |
|-----------------|--------------------------------|
| GAPDH-forward   | 5'-cacatggcctccaaggagtaa-3'    |
| GAPDH-reverse   | 5' cttcaaggggtctacatggca-3'    |
| MDM2- forward   | 5'-gaacttggtagtagtcaatcagc-3'  |
| MDM2-reverse    | 5'-gcctgatacacagtaacttgata-3'  |
| p53-forward     | 5'-ctcctggcccctgtcatcttc3'     |
| p53-reverse     | 5'-agcgcctcacaacctccgta-3'     |
| c-Myc- forward  | 5'-cttctctccgtcctcggattct-3'   |
| c-Myc-reverse   | 5'-gaaggtgatccagactctgacctt-3' |

|              |                               |
|--------------|-------------------------------|
| USP7-forward | 5'-ctctcagaccatgggatttcac-3'  |
| USP7-reverse | 5'-attggtgttagatatccccacag-3' |

S4 Table : Reported biological activities of compounds that interact USP7 enzyme.

| <b>Compound Code</b> | <b>Biological Activity</b>                                             |
|----------------------|------------------------------------------------------------------------|
| Compound 1 (ss075)   | Anti-oxidant, anti-cancer, and in-vitro anti-epileptic activities      |
| Compound 2 (Ss043)   | <i>In-vitro</i> anti-microbial activity                                |
| Compound 3 (ss046)   | Negatively modulate the activity of p8 subunit of transcription factor |
| Compound 4 (ss054)   | <i>In-vitro</i> anti-microbial activity                                |
| Compound 5 (SS039)   | Anti-microbial, analgesic, and anti-inflammatory activities            |
| Compound 6 (AAB407)  | <i>In-vitro</i> anti-microbial activity                                |
| Compound 7 (AAB431)  | Anti-bacterial, anti-cancer, anti-oxidant activities                   |
| Compound 8 (AAB430)  | <i>In-vitro</i> anti-microbial activity                                |
| Compound 9 (AAB438)  | Xanthine oxidase inhibitory activity                                   |
| Compound 10 (DB075)  | For curing pellagra disease                                            |
| Compound 11 (AAB422) | <i>In-vitro</i> anti-microbial activity                                |
| Compound 12 (DB190)  | For curing hyper-pigmentation                                          |
